# Supplementary material for: Restricted immunological and cellular pathways are shared by murine models of chronic alcohol consumption
Source: PubMed Central journal article supplement (PMC7016184; doi:10.1038/s41598-020-59188-9), 2020-02-12
Supplement: 41598_2020_59188_MOESM1_ESM.pdf [file 41598_2020_59188_MOESM1_ESM.pdf]

## **SUPPLEMENTARY INFORMATION**

### **Restricted immunological and cellular pathways are shared by murine models of chronic alcohol consumption**

Alyx Vogle<sup>1</sup>, Tongqi Qian<sup>2</sup>, Shijia Zhu<sup>2</sup>, Elizabeth Burnett<sup>1</sup>, Holger Fey<sup>1</sup>, Zhibin Zhu<sup>1</sup>, Ali Keshavarzian<sup>1</sup>, Maliha Shaikh<sup>1</sup>, Yujin Hoshida<sup>2</sup>, Miran Kim<sup>1</sup>, Costica Aloman<sup>1\*</sup>

<sup>1</sup>Division of Digestive Diseases and Nutrition, Section of Hepatology, Rush University, Chicago, IL, USA

<sup>2</sup>University of Texas Southwestern Medical Center, Division of Digestive Diseases, Department of Internal Medicine

\* indicates corresponding author

Supplementary Figure 1

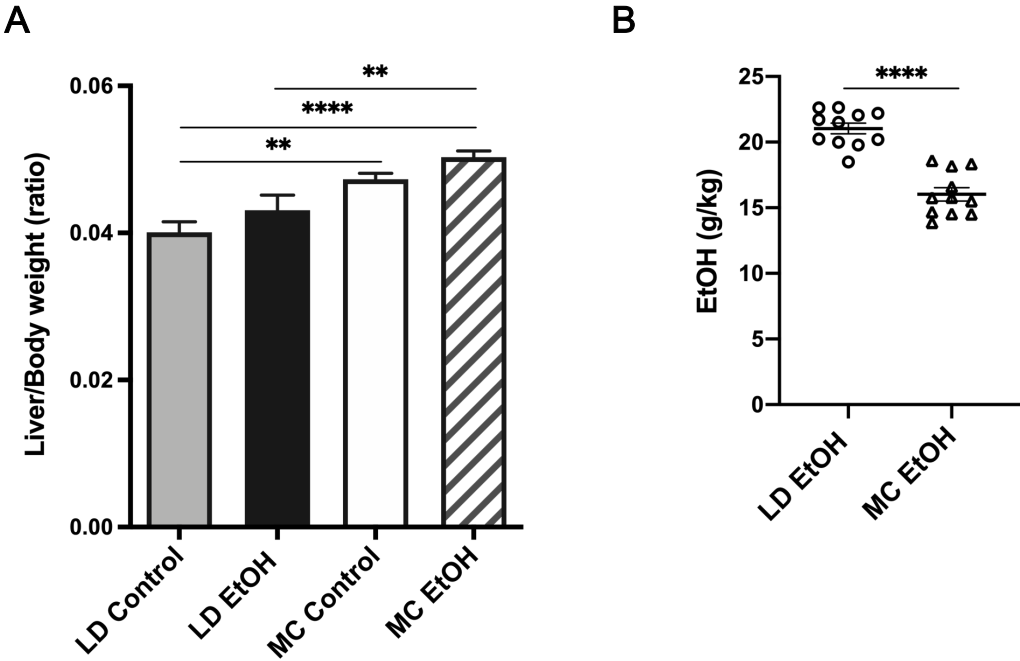

- (A) Mice were subject to LD control (LD Control), LD ethanol (LD EtOH), regular chow diet (MC Control) and chronic ethanol exposure as per MC model (MC EtOH). The data represent the mean  $\pm$  SEM,  $**p < 0.01$ ;  $****p < 0.0001$  (2-way ANOVA with Tukey's test,  $n = 10$  mice LD group,  $n = 52$  mice MC group).
- (B) Mice were subject to LD control (LD Control), LD ethanol (LD EtOH), regular chow diet (MC Control) and chronic ethanol exposure as per MC model (MC EtOH). LD diet and MC EtOH (ethanol in drinking water) were freshly prepared every day. The body weights of all mice and the amounts of ethanol consumption were measured every day. The data represent the mean  $\pm$  SEM,  $****p < 0.0001$  ( $t$ -test with the Holm-Sidak method,  $n = 5$  mice per group).

Supplementary Figure 2

A

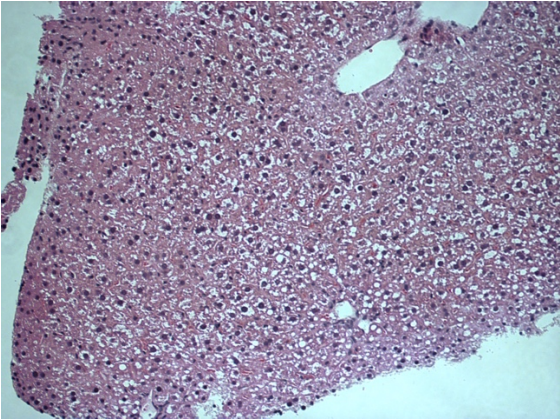

B

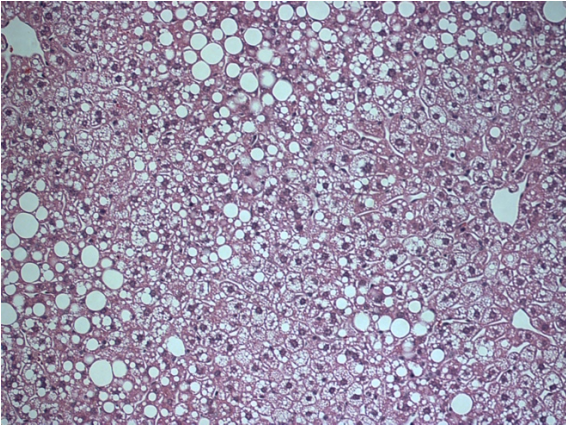

C

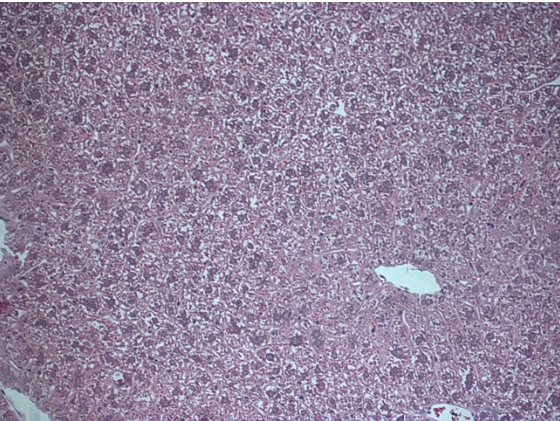

D

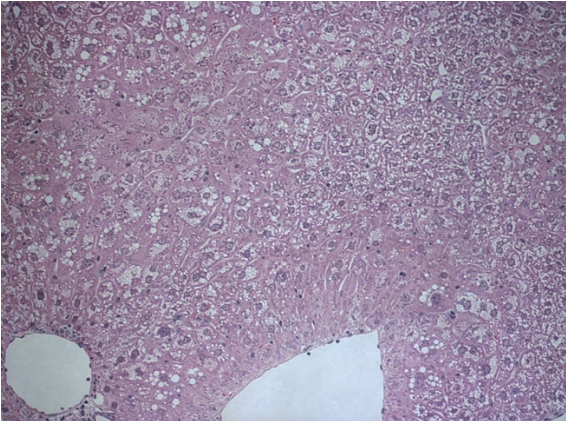

Liver tissue from mice subjected to LD control (Panel A), LD ethanol (Panel B), regular chow diet (Panel C) and chronic ethanol exposure as per MC model (Panel D) was fixed in 10% formalin for 24 hours, embedded in paraffin and stained with standard Hematoxylin and Eosin (H&E). Representative pictures x2000 were taken.

Supplementary Figure 3

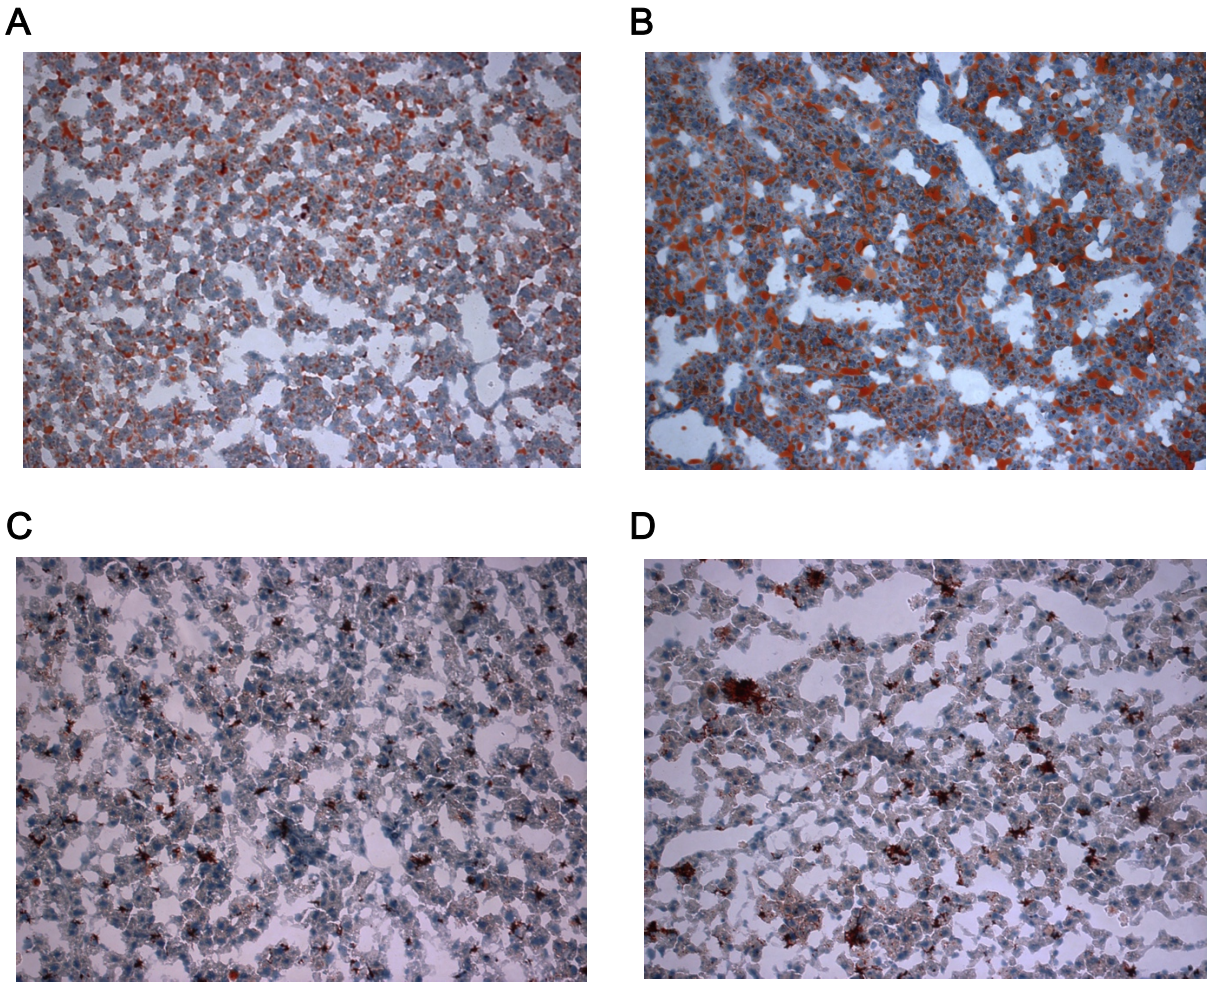

Liver tissue from mice subjected to LD control (Panel A), LD ethanol (Panel B), regular chow diet (Panel C) and chronic ethanol exposure as per MC model (Panel D) were fixed in Tissue-Tek Optimal Cutting Temperature (OCT) compound (Sakura Inc, CA), processed and stained with Oil Red O. Representative pictures x2000 were taken.

**Supplementary Table 1. List of DEGs (differential expressed genes) induced by alcohol and diet type**

| MC EtOH vs. MC Control |                                      | MC Control vs. LD Control |                                                            | LD EtOH vs. LD Control |                                                                     | MC EtOH vs. LD EtOH |                                                             |
|------------------------|--------------------------------------|---------------------------|------------------------------------------------------------|------------------------|---------------------------------------------------------------------|---------------------|-------------------------------------------------------------|
| Rgs16                  | regulator of G-protein signaling 16  | Fabp5l2                   | fatty acid binding protein 5-like 2                        | Arhgef16               | Rho guanine nucleotide exchange factor (GEF) 16                     | Lrp2bp              | Lrp2 binding protein                                        |
| Mogat1                 | monoacylglycerol O-acyltransferase 1 | Adamdec1                  | ADAM-like, decysin 1                                       | Scd3                   | stearoyl-coenzyme A desaturase 3                                    | Dact1               | dishevelled-binding antagonist of beta-catenin 1            |
| Zfp872                 | zinc finger protein 872              | Ncam2                     | neural cell adhesion molecule 2                            | Hmgcr                  | 3-hydroxy-3-methylglutaryl-Coenzyme A reductase                     | Sult3a1             | sulfotransferase family 3A, member 1                        |
| Lurap1                 | leucine rich adaptor protein 1       | Mirg                      | miRNA containing gene                                      | Fads2                  | fatty acid desaturase 2                                             | Sfrp1               | secreted frizzled-related protein 1                         |
|                        |                                      |                           |                                                            | Noct                   | nocturnin (Ccr4)                                                    | Grc10               | gene rich cluster, C10 gene                                 |
| Sult1e1                | sulfotransferase family 1E, member 1 | Afp                       | alpha fetoprotein                                          | Pklr                   | pyruvate kinase liver and red blood cell                            | Cd207               | CD207 antigen                                               |
| Chil3                  | chitinase-like 3                     | Krt23                     | keratin 23                                                 | Gstp3                  | glutathione S-transferase pi 3                                      | Cyp2c54             | cytochrome P450, family 2, subfamily c, polypeptide 54      |
| A1bg                   | alpha-1-B glycoprotein               | Marco                     | macrophage receptor with collagenous structure             | Hsbp111                | heat shock factor binding protein 1-like 1                          | Sult2a7             | sulfotransferase family 2A, member 7                        |
|                        |                                      | Slc39a5                   | solute carrier family 39 (metal ion transporter), member 5 | Gstm3                  | glutathione S-transferase, mu 3                                     | Slco1a1             | solute carrier organic anion transporter family, member 1a1 |
|                        |                                      | Cyp4a14                   | cytochrome P450, family 4, subfamily a, polypeptide 14     | Prss8                  | protease, serine 8                                                  |                     |                                                             |
|                        |                                      | Elovl3                    | elongation of very long chain fatty acids-like 3           | Aqp4                   | aquaporin 4                                                         | Spr1a               | small proline-rich protein 1A                               |
|                        |                                      | Cyp4a31                   | cytochrome P450, family 4, subfamily a, polypeptide 31     | Cyp17a1                | cytochrome P450, family 17, subfamily a, polypeptide 1              | Nr4a1               | nuclear receptor subfamily 4, group A, member 1             |
|                        |                                      |                           |                                                            | Scd1                   | stearoyl-Coenzyme A desaturase 1                                    | Ppp1r3g             | protein phosphatase 1, regulatory subunit 3G                |
|                        |                                      |                           |                                                            | Fasn                   | fatty acid synthase                                                 | Aqp4                | aquaporin 4                                                 |
|                        |                                      |                           |                                                            | Atp2b2                 | ATPase, Ca <sup>++</sup> transporting, plasma membrane 2            | Dbp                 | D site albumin promoter binding protein                     |
|                        |                                      |                           |                                                            | Slc22a29               | solute carrier family 22. member 29                                 | Gdf15               | growth differentiation factor 15                            |
|                        |                                      |                           |                                                            | Apoa4                  | apolipoprotein A-IV                                                 | Sult2a3             | sulfotransferase family 2A, member 3                        |
|                        |                                      |                           |                                                            | Slc2a4                 | solute carrier family 2 (facilitated glucose transporter), member 4 | Fgf21               | fibroblast growth factor 21                                 |

**Supplementary Table 1. Continued**

| MC EtOH vs. MC Control |  | MC Control vs. LD Control |  | LD EtOH vs. LD Control |                                                             | MC EtOH vs. LD EtOH |                                                        |
|------------------------|--|---------------------------|--|------------------------|-------------------------------------------------------------|---------------------|--------------------------------------------------------|
|                        |  |                           |  | Nr4a1                  | nuclear receptor subfamily 4, group A, member 1             | Nr1d1               | nuclear receptor subfamily 1, group D, member 1        |
|                        |  |                           |  | Ppp1r3g                | protein phosphatase 1, regulatory subunit 3G                | Cyp17a1             | cytochrome P450, family 17, subfamily a, polypeptide 1 |
|                        |  |                           |  | Fgf21                  | fibroblast growth factor 21                                 | Zfp36               | zinc finger protein 36                                 |
|                        |  |                           |  | Pdgfrl                 | platelet-derived growth factor receptor-like                |                     |                                                        |
|                        |  |                           |  | Sprr1a                 | small proline-rich protein 1A                               |                     |                                                        |
|                        |  |                           |  |                        |                                                             |                     |                                                        |
|                        |  |                           |  | Slco1a1                | solute carrier organic anion transporter family, member 1a1 |                     |                                                        |
|                        |  |                           |  | Ikzf3                  | IKAROS family zinc finger 3                                 |                     |                                                        |
|                        |  |                           |  | Cyp2c54                | cytochrome P450, family 2, subfamily c, polypeptide 54      |                     |                                                        |
|                        |  |                           |  | Clec2h                 | C-type lectin domain family 2, member h                     |                     |                                                        |
|                        |  |                           |  | Sult2a7                | sulfotransferase family 2A, member 7                        |                     |                                                        |
|                        |  |                           |  | Sult3a1                | sulfotransferase family 3A, member 1                        |                     |                                                        |
|                        |  |                           |  | Prok1                  | prokineticin 1                                              |                     |                                                        |

\* Red font, up; Blue font, down; Green font, up or down from different comparisons

**Supplementary Table 2. List of DEGs analyzed by the four-way comparison**

| LD EtOH vs. LC and MC vs. LC |                                                         | MC vs. LC and MC EtOH vs. LD EtOH |                                           | MC EtOH vs. MC and LD EtOH vs. LC |                                                  | MC EtOH vs. MC and LD EtOH vs. LC and MC vs. LC |                                                | MC EtOH vs. MC and MC EtOH vs. LD EtOH |             |
|------------------------------|---------------------------------------------------------|-----------------------------------|-------------------------------------------|-----------------------------------|--------------------------------------------------|-------------------------------------------------|------------------------------------------------|----------------------------------------|-------------|
| <b>Slc34a2</b>               | solute carrier family 34 (sodium phosphate), member 2   | <b>Srgap3</b>                     | SLIT-ROBO Rho GTPase activating protein 3 | <b>Elovl6</b>                     | elongation of very long chain fatty acids-like 6 | <b>Pnpla3</b>                                   | patatin-like phospholipase domain containing 3 | <b>Lcn2</b>                            | lipocalin 2 |
| <b>Cyp2b10</b>               | cytochrome P450, family 2, subfamily b, polypeptide 10  | <b>Sult5a1</b>                    | sulfotransferase family 5A, member 1      | <b>Sult2a3</b>                    | sulfotransferase family2A, member 3              |                                                 |                                                |                                        |             |
| <b>Aacs</b>                  | acetoacetyl-CoA synthetase                              | <b>Sult3a2</b>                    | sulfotransferase family 3A, member 2      | <b>Mup11</b>                      | Major urinary protein 11                         |                                                 |                                                |                                        |             |
| <b>Ugt1a5</b>                | UDP glucuronosyltransferase 1 family, polypeptide A5    | <b>A1bg</b>                       | alpha-1-B glycoprotein                    |                                   |                                                  |                                                 |                                                |                                        |             |
| <b>Cyp3a44</b>               | cytochrome P450, family 3, subfamily a, polypeptide 44  |                                   |                                           |                                   |                                                  |                                                 |                                                |                                        |             |
| <b>Dntt</b>                  | deoxynucleotidyltransferase, terminal                   |                                   |                                           |                                   |                                                  |                                                 |                                                |                                        |             |
| <b>Cyp26a1</b>               | cytochrome P450, family 26, subfamily a, polypeptide 1  |                                   |                                           |                                   |                                                  |                                                 |                                                |                                        |             |
| <b>Prom1</b>                 | prominin 1                                              |                                   |                                           |                                   |                                                  |                                                 |                                                |                                        |             |
| <b>Chrna4</b>                | cholinergic receptor, nicotinic, alpha polypeptide 4    |                                   |                                           |                                   |                                                  |                                                 |                                                |                                        |             |
| <b>Cyp3a41a</b>              | cytochrome P450, family 3, subfamily a, polypeptide 41A |                                   |                                           |                                   |                                                  |                                                 |                                                |                                        |             |
|                              |                                                         |                                   |                                           |                                   |                                                  |                                                 |                                                |                                        |             |
| <b>Slc6a16</b>               | solute carrier family 6, member 16                      |                                   |                                           |                                   |                                                  |                                                 |                                                |                                        |             |

\* Red font, up; Blue font, down; Green font, up or down from different comparisons

**Supplementary Table 3. Fluorochrome conjugated antibodies used for Flow cytometry analysis**

| <b>Abs</b>   | <b>Clone</b> | <b>Fluorochromes</b> | <b>Dilution</b> |
|--------------|--------------|----------------------|-----------------|
| <b>CD45</b>  | 30-F11       | APC-Cy7              | 1:200           |
| <b>CD3</b>   | 145-2C11     | PE-CF594             | 1:200           |
| <b>CD19</b>  | 1D3          | PE-CF594             | 1:200           |
| <b>NK1.1</b> | PK136        | PE-CF594             | 1:200           |
| <b>Ly6G</b>  | 1A8          | AF 700               | 1:200           |
| <b>PDCA1</b> | 927          | AF 488               | 1:200           |
| <b>MHCII</b> | M5/114.15.2  | PE-Cy7               | 1:400           |
| <b>CD11c</b> | N418         | BV 650               | 1:200           |
| <b>CD11b</b> | M1/70        | BV 421               | 1:200           |
| <b>F4/80</b> | BM8          | APC                  | 1:100           |



**Supplementary Table 4. List of TaqMan primers used for RT-qPCR**

| Name (Mouse)  | Gene abbreviation | Gene Name                                                 | TaqMan ID     | Conventional Forward    | Conventional Reverse     |
|---------------|-------------------|-----------------------------------------------------------|---------------|-------------------------|--------------------------|
| B2M           | B2m               | beta-2 microglobulin                                      | Mm00437762_m1 | TTCTGGTGCTTGTCTCACTGA   | CAGTATGTTCCGGCTTCCCATTCC |
| ACTB          | Actb              | actin, beta                                               | Mm02619580_g1 | ACCCGCCTCACATTGAAATCC   | GGCGTATGTATCAGTCTCAGTG   |
| ASMA          | Acta2             | actin, alpha 2, smooth muscle, aorta                      | Mm00725412_s1 | GGCACCCTGAACCCTAAGG     | ACAATACCAGTTGTACGTCCAGA  |
| COL1A1        | Col1a1            | collagen, type I, alpha 1                                 | Mm00801666_g1 | CTGGCGGTTTCAGGTCCAAT    | TTCCAGGCAATCCACGAGC      |
| COL1A2        | Col1a2            | collagen, type I, alpha 2                                 | Mm00483888_m1 | AAGGGTGTACTGGACTCCC     | TTGTTACCGGATTCTCCTTTGG   |
| PDGFRb        | Pdgfrb            | platelet-derived growth factor receptor, beta polypeptide | Mm00435546_m1 | AGGAGTGATACCAGCTTTAGTCC | CCGAGCAGGTCAGAACAAGG     |
| TGFb1         | Tgfb1             | transforming growth factor, beta 1                        | Mm01178820_m1 | CTCCCGTGGCTTCTAGTGC     | GCCTTAGTTTGGACAGGATCTG   |
| IL-1 $\alpha$ | Il1a              | interleukin 1, alpha                                      | Mm00439620_m1 | CGAAGACTACAGTTCTGCCATT  | GACGTTTCAGAGTTCTCAGAG    |
| IL-1 $\beta$  | Il1b              | interleukin 1, beta                                       | Mm00434228_m1 | GAAATGCCACCTTTTGACAGTG  | TGGATGCTCTCATCAGGACAG    |
| IL-6          | Il6               | interleukin 6                                             | Mm00446190_m1 | CTGCAAGAGACTTCCATCCAG   | AGTGGTATAGACAGGTCTGTTGG  |
| IL-7          | Il7               | interleukin 7                                             | Mm01295803_m1 | TTCCTCCACTGATCCTTGTCT   | AGCAGCTTCCTTTGTATCATCAC  |
| TNF $\alpha$  | Tnf               | tumor necrosis factor alpha                               | Mm00443258_m1 | CCTGTAGCCCACGTCGTAG     | GGGAGTAGACAAGGTACAACCC   |
| ICAM-1        | Icam1             | intercellular adhesion molecule 1                         | Mm00516023_m1 | TGCCTCTGAAGCTCGGATATAC  | TCTGTGGAACCTCCTCAGTCAC   |
| ICAM-2        | Icam2             | intercellular adhesion molecule 2                         | Mm00494862_m1 | GCAGGACAACCAAATGGTCAT   | AGAACAGCAGTATTGACACCAC   |
| VCAM-1        | Vcam1             | vascular cell adhesion molecule 1                         | Mm01320970_m1 | TTCGGTTGTTCTGACGTGTG    | TACCACCCCATGAGGGGAC      |
| E-selectin    | Sele              | selectin, endothelial cell                                | Mm00441278_m1 | ATGAAGCCAGTGCATACTGTC   | CGGTGAATGTTTCAGATTGGAGT  |
| P-selectin    | Selpg             | selectin, platelet ligand                                 | Mm01204601_m1 | CCACCGAAGTCCCTCCAC      | GCCGCTGTCAGGTAAGTA       |
| JAM-A         | F11r              | F11 receptor                                              | Mm00554113_m1 | TCTCTCACGTCTATGATCCTGG  | TTTGATGGACTCGTTCTCGGG    |
| JAM-B         | Jam2              | junction adhesion molecule 2                              | Mm00470197_m1 | GTGCCCACTTCTGTTATGACTG  | TTCCCTAGCAAACCTGTGCCA    |
| JAM-C         | Jam3              | junction adhesion molecule 3                              | Mm00499214_m1 | CTTGATCATTACGGACTCACA   | GCCAGGTCTCCTTGAATCTTGT   |
| CCL2          | Ccl2              | chemokine (C-C motif) ligand 2                            | Mm00441242_m1 | TAAAAACCTGGATCGGAACCAAA | GCATTAGCTTCAGATTTACGGGT  |

**Supplementary Table 4. Continued**

| <b>Name (Mouse)</b> | <b>Gene abbreviation</b> | <b>Gene Name</b>                  | <b>TaqMan ID</b> | <b>Conventional Forward</b> | <b>Conventional Reverse</b> |
|---------------------|--------------------------|-----------------------------------|------------------|-----------------------------|-----------------------------|
| CCL3                | Ccl3                     | chemokine (C-C motif) ligand 3    | Mm00441259_g1    | TGTACCATGACACTCTGCAAC       | CAACGATGAATTGGCGTGGAA       |
| CCL4                | Ccl4                     | chemokine (C-C motif) ligand 4    | Mm00443111_m1    | TTCCTGCTGTTTCTCTTACACCT     | CTGTCTGCCTCTTTTGGTCAG       |
| CCL5                | Ccl5                     | chemokine (C-C motif) ligand 5    | Mm01302427_m1    | GCTGCTTTGCCTACCTCTCC        | TCGAGTGACAAACACGACTGC       |
| CCL7                | Ccl7                     | chemokine (C-C motif) ligand 7    | Mm00443113_m1    | GCTGCTTTCAGCATCCAAGTG       | CCAGGGACACCGACTACTG         |
| CCL19               | Ccl19                    | chemokine (C-C motif) ligand 19   | Mm00839967_g1    | GGGGTGCTAATGATGCGGAA        | CCTTAGTGTGGTGAACACAACA      |
| CCL20               | Ccl20                    | chemokine (C-C motif) ligand 20   | Mm01268754_m1    | GCCTCTCGTACATACAGACGC       | CCAGTTCTGCTTTGGATCAGC       |
| CCL21A              | Ccl21a                   | chemokine (C-C motif) ligand 21   | Mm03646971_gH    | GTGATGGAGGGGGTCAGGA         | GGGATGGGACAGCCTAAACT        |
| CCL21B              | Ccl21b                   |                                   |                  |                             |                             |
| CCL25               | Ccl25                    | chemokine (C-C motif) ligand 25   | Mm00436443_m1    | GAGGGCGATGAGAATCTTGAC       | TCCTCACGCTTGTACTGTTGG       |
| CCL27               | Ccl27                    | chemokine (C-C motif) ligand 27   | Mm04206819_gH    | AGGAGGATTGTCCACATGGAA       | CTTGCGTTCTAACCACCGA         |
| CCL28               | Ccl28                    | chemokine (C-C motif) ligand 28   | Mm00445039_m1    | AGAGTGAGTTCATGCAGCATC       | CTGCTTCAAAGTACGATTGTGC      |
| CXCL9               | Cxcl9                    | chemokine (C-X-C motif) ligand 9  | Mm00434946_m1    | TCCTTTTGGGCATCATCTTCC       | TTTGTAGTGGATCGTGCCTCG       |
| CXCL10              | Cxcl10                   | chemokine (C-X-C motif) ligand 10 | Mm00445235_m1    | CCAAGTGCTGCCGTCATTTTC       | TCCCTATGGCCCTCATTCTCA       |
| CXCL11              | Cxcl11                   | chemokine (C-X-C motif) ligand 11 | Mm00444662_m1    | GGCTTCCTTATGTTCAAACAGGG     | GCCGTTACTCGGGTAAATTACA      |
| CXCL12              | Cxcl12                   | chemokine (C-X-C motif) ligand 12 | Mm00445553_m1    | TGCATCAGTGACGGTAAACCA       | CACAGTTTGGAGTGTTGAGGAT      |
